# Supplementary material
Source: MDPI journal article supplement (https://www.mdpi.com/2073-4352/12/7/982)
Supplement: s1 [file s1]

## **Supplementary Material**

# **The Crystal Structure of 3-Amino-1-(4-Chlorophenyl)-9-Methoxy-1*H*-Benzo[*f*]Chromene-2-Carbonitrile: Antimicrobial activity and Docking Studies**

Rawda M. Okasha <sup>1</sup>, Ahmed M. Fouda <sup>2</sup>, Majed A. Bajaber <sup>2</sup>, Hazem A. Ghabbour <sup>3</sup>, Abd El-Galil E. Amr <sup>4,5,\*</sup>, Ahmed M. Naglah <sup>4,5</sup>, Abdulrahman A. Almehizia <sup>4</sup> Ahmed A. Elhenawy <sup>6,7,\*</sup> and Ahmed M. El-Agrody <sup>6,\*</sup>

<sup>1</sup> Chemistry Department, Faculty of Science, Taibah University, Medina 30002, Saudi Arabia; rawdao@yahoo.com

<sup>2</sup> Chemistry Department, Faculty of Science, King Khalid University, Abha 61413, Saudi Arabia; amfouda@hotmail.com (A.M.F.); mb@kku.edu.sa (M.A.B.)

<sup>3</sup> Department of Medicinal Chemistry, Faculty of Pharmacy, University of Mansoura, Mansoura 35516, Egypt; ghabbourh@yahoo.com

<sup>4</sup> Pharmaceutical Chemistry Department, Drug Exploration and Development Chair (DEDC), College of Pharmacy, King Saud University, Riyadh 11451, Saudi Arabia; anaglah@ksu.edu.sa (A.M.N.); mehizia@ksu.edu.sa (A.A.A.)

<sup>5</sup> Applied Organic Chemistry Department, National Research Centre, Dokki, Giza 12622, Egypt

<sup>6</sup> Chemistry Department, Faculty of Science, Al-Azhar University, Nasr City, Cairo 11884, Egypt

<sup>7</sup> Chemistry Department, Faculty of Science and Art, AlBaha University, Mukhwah, Al Bahah 65731, Saudi Arabia

\* Correspondence: aamr@ksu.edu.sa (A.E.-G.E.A.); elhenawy\_sci@hotmail.com (A.A.E.); elagrody\_am@azhar.edu.eg (A.M.E.-A.)

| <b>Table of Contents:</b>                                                                     | <b>Page</b> |
|-----------------------------------------------------------------------------------------------|-------------|
| <b>Figure S1:</b> $^1\text{H}$ NMR spectrum (DMSO- $d_6$ , 500 MHz) of compound <b>4</b> .    | S3          |
| <b>Figure S2:</b> $^1\text{H}$ NMR spectrum (DMSO- $d_6$ , 500 MHz) of compound <b>4</b> .    | S4          |
| <b>Figure S3:</b> $^{13}\text{C}$ NMR spectrum (DMSO- $d_6$ , 125 MHz) of compound <b>4</b> . | S5          |







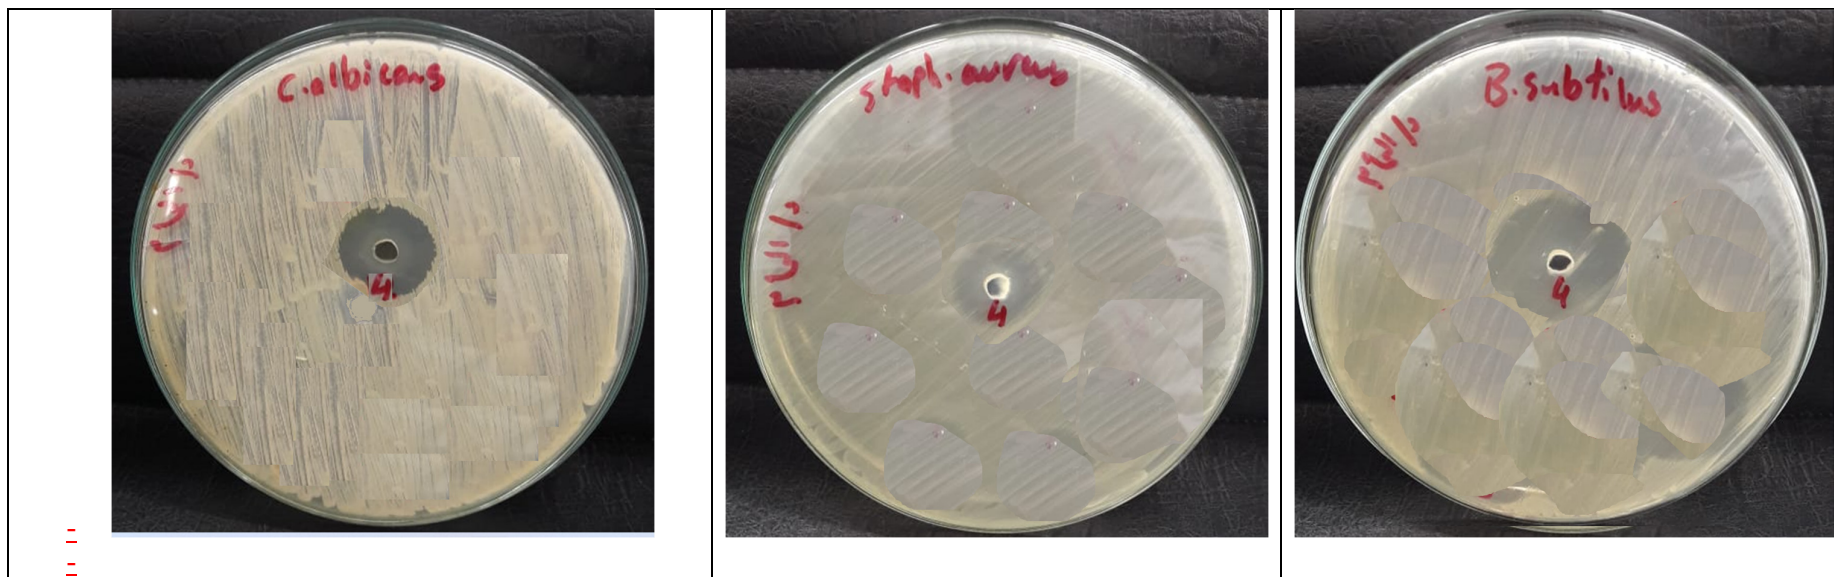

Figure S4: The inhibition zone of compound 4.
